# Supplementary material
Source: PubMed Central journal article supplement (PMC4875396)

## Materials and methods

### Protein Expression and Purification

The *lida* gene was amplified by PCR and cloned into pET-28a expression vector to generate a recombinant protein containing a 6×His-tag at the N-terminus. The His-tagged LidA protein was overexpressed in *E. coli* strain BL21 (DE3). An overnight culture in 200 ml of LB medium was transferred into 4 L of LB medium with 50 µg/ml kanamycin and continuously grown at 37 °C until its OD<sub>600</sub> reached 0.6. The expression of LidA was induced by adding isopropyl-1-thio-β-D-galactopyranoside (IPTG) to a final concentration of 0.5 mM for 6 hours at 30 °C.

The selenomethionine(SeMet)-substituted LidA protein was overexpressed in *E. coli* strain B834 (DE3). The single colony was first cultured in 20 ml of LB medium with 50 µg/ml kanamycin overnight, which was then transferred into 200 ml of medium comprising 20% LB medium and 80% M9 medium and continuously grown at 37 °C and 210 rpm. When its OD<sub>600</sub> reached 0.6, the cells were harvested by centrifugation at 2000 rpm at 4 °C. The cells were resuspended in M9 medium and transferred into 4 L M9 medium containing 50 µg/ml kanamycin and 50 µg/ml selenomethionine, and continuously grown at 37 °C and 210 rpm. When its OD<sub>600</sub> reached 0.6, IPTG was added to a final concentration of 0.5 mM to induce the expression of selenium-labeled LidA for 20 hours at 18 °C. The cells were collected and resuspended as mentioned above.

Both the native and selenium-labeled cells were sonicated, and the lysate was centrifuged at 38,900g for 30 min twice at 4 °C. The supernatant was collected and clarified further through a 0.22-µm filter. The native and selenium-labeled LidA proteins were purified by nickel affinity chromatography followed by a gel-filtration chromatography (Superdex-200 size exclusion column, GE Healthcare, USA). At last, the pure native and selenium-labeled proteins were desalted to the buffer containing 10 mM HEPES (pH 7.5) and 200 mM NaCl and concentrated to 20 mg/ml for further

studies. The truncation of LidA<sub>60-594</sub> was expressed and purified as the full-length LidA.

### **Crystallization and Data Collection**

Native proteins were used for initial crystal screening with commercial kits (Hampton Research, USA) at 20°C by sitting-drop vapor-diffusion method. Each drop included 1 µl of protein solution and 1 µl of reservoir solution and was equilibrated against 150 µl of reservoir solution. Both native and selenium-labeled LidA were used for crystal optimization and data collection. After optimization, the best crystal was achieved from 200 mM Trimethylamine N-oxide, pH 8.0, 20% (w/v) PEG 2000 MME and 1% glycerol.

Both native and selenium-labeled crystals were soaked in 20%-glycerol-contained cryo-protectant and were subsequently flash-frozen in liquid nitrogen for further crystallographic experiments. X-ray diffraction data were collected on MAR 225 image plate detector at a wavelength of 0.9795 Å for selenium-labeled crystal and 0.9792 Å for native crystal at beamline BL17U of Shanghai Synchrotron Radiation Facility (SSRF). Both datasets were indexed, scaled, and merged by using HKL2000.

### **Structural Determination and Refinement**

Single-wavelength anomalous dispersion (SAD) data of selenium-labeled LidA crystal at a 2.9-Å resolution were employed to solve phasing problem. With Shelx, 8 of 18 selenium sites in one asymmetric unit were located. Phase calculation, phase refinement, and initial model building were performed using PHENIX. AutoSol. The 60%-covered initial model was further built manually in Coot. Data of native LidA crystal to a 2.1-Å resolution were used for alternate cycles of manual adjustment in Coot and refinement with PHENIX.refine. The statistics of diffraction data and refinement are summarized in Table 1.

### **Surface Plasmon Resonance (SPR) measurements**

Phosphatidylinositol 3-phosphate diC4 [PtdIns(3)P, P-3004] were obtained from Echelon. The SPR binding experiments were performed with a four-channel BIAcore 100 biosensor system (BIAcore, Inc.). Purified LidA<sub>60-594</sub> was diluted to 50 µg/ml with running buffer [20 mM HEPES (pH7.5), 150 mM NaCl] and immobilized onto CM5 sensor chips (GE Healthcare) according to standard procedures. PtdIns(3)P diluted with the same buffer to concentrations of 0, 15.625, 31.25, 62.5, and 125 µM was injected into the flow cells at a rate of 50 µl/min at 25°C. For affinity assay, binding and dissociation were monitored with a BIAcore X. The data were corrected by subtracting the signal of the reference cell and fitted by the BIAevaluation software version 4.1 (GE Healthcare).

**Table 1**

| <b>Table 1. LidA Diffraction Data and Refinement Statistics</b> |                                               |                                               |
|-----------------------------------------------------------------|-----------------------------------------------|-----------------------------------------------|
|                                                                 | LidA <sub>60–594</sub>                        | Se-Met LidA                                   |
| Crystallographic data                                           |                                               |                                               |
| $d_{\min}$ (Å)                                                  | 2.1 (2.15 ~                                   | 2.90 (2.97 ~                                  |
| Wavelength (Å)                                                  | 0.9792                                        | 0.9795                                        |
| Measured reflections                                            | 35,304                                        | 25,537                                        |
| Average redundancy                                              | 10.6                                          | 3.6                                           |
| Mean $I/\sigma(I)$                                              | 8.0                                           | 13.0                                          |
| Completeness (%)                                                | 99.9 (99.7)                                   | 97.4 (80.2)                                   |
| $R_{\text{merge}}^a$                                            | 0.147                                         | 0.072 (0.317)                                 |
| Refinement statistics                                           |                                               |                                               |
| Bragg spacing (Å)                                               | 46.0 – 2.10                                   | 42.4 – 2.9                                    |
| Space group                                                     | P2 <sub>1</sub> 2 <sub>1</sub> 2 <sub>1</sub> | P2 <sub>1</sub> 2 <sub>1</sub> 2 <sub>1</sub> |
| Cell parameters                                                 |                                               |                                               |
| a (Å)                                                           | 64.5                                          | 64.4                                          |
| b (Å)                                                           | 164.4                                         | 169.1                                         |
| c (Å)                                                           | 55.6                                          | 58.3                                          |
| Reflections in working set                                      | 33,550                                        |                                               |
| Reflections in test set                                         | 1,754                                         |                                               |
| $R_{\text{cryst}}^b$                                            | 0.203                                         |                                               |
| $R_{\text{free}}^c$                                             | 0.249                                         |                                               |
| r.m.s.d. bonds (Å)                                              | 0.004                                         |                                               |
| r.m.s.d. angles (°)                                             | 0.78                                          |                                               |
| Average $B$ -factor (Å <sup>2</sup> )                           | 42.0                                          |                                               |
| No. of waters                                                   | 422                                           |                                               |

Values in parentheses indicate the corresponding statistics in the highest resolution shell.

$^a R_{\text{merge}} = (\sum |I_i - \langle I_i \rangle|) / \sum I_i$ , where  $I_i$  is the integrated intensity of a given reflection.

$^b R_{\text{cryst}} = (\sum ||F_o| - |F_c||) / \sum |F_o|$ , where  $F_o$  and  $F_c$  denote observed and calculated structure factors, respectively.

$^c R_{\text{free}}$  is equivalent to  $R_{\text{cryst}}$  but calculated using randomly chosen 10% reflections as the test set, which were excluded from refinement process.

**Figure 1.**

Structure-based sequence alignment of two TBR motifs and their adjacent  $\alpha$ -helical hairpin  $\alpha h1$  and  $\alpha h2$ . The square-knot  $\beta$ -hairpins  $\beta h1$  and  $\beta h3$  are highly homologous, especially for the  $\beta$ -turn and  $3_{10}$  helix between two  $\beta$ -strands. The canonical  $\beta$ -hairpins  $\beta h2$ ,  $\beta h4$  and  $\beta h5$  are also homologous.

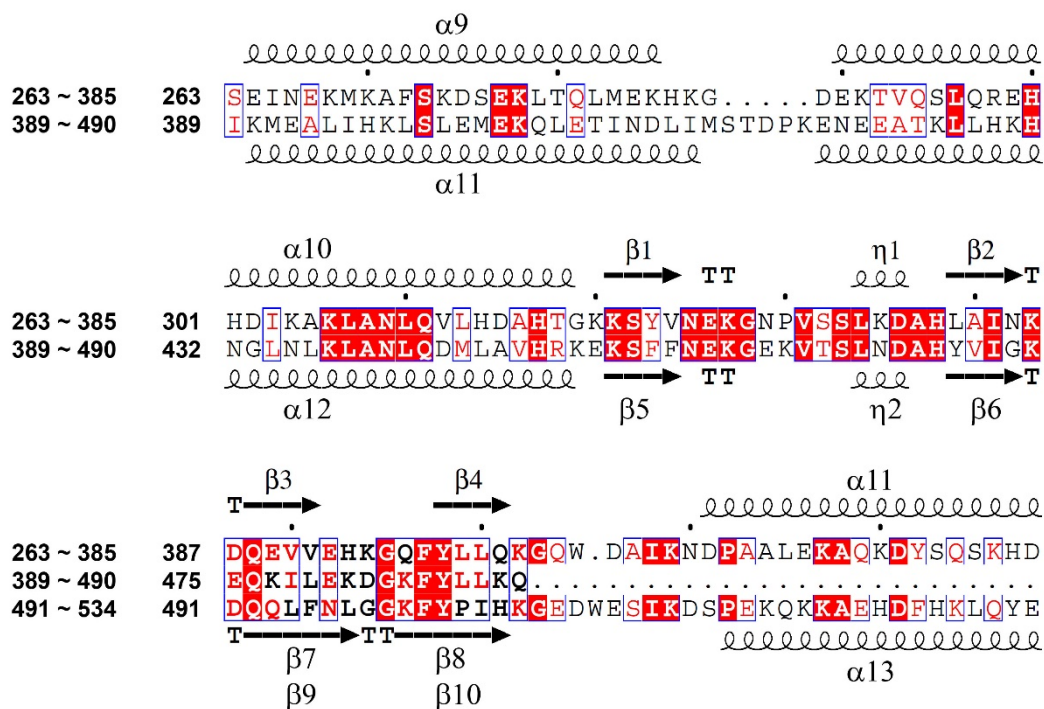

**Figure 2.**

SPR sensorgrams for binding of PtdIns(3)P and LidA<sub>60-594</sub>. The concentration range of PtdIns(3)P is from 0  $\mu$ M for the bottom curve to 125  $\mu$ M for the top curve. The reaction is around 300 seconds. The  $K_d$  was 3  $\mu$ M.

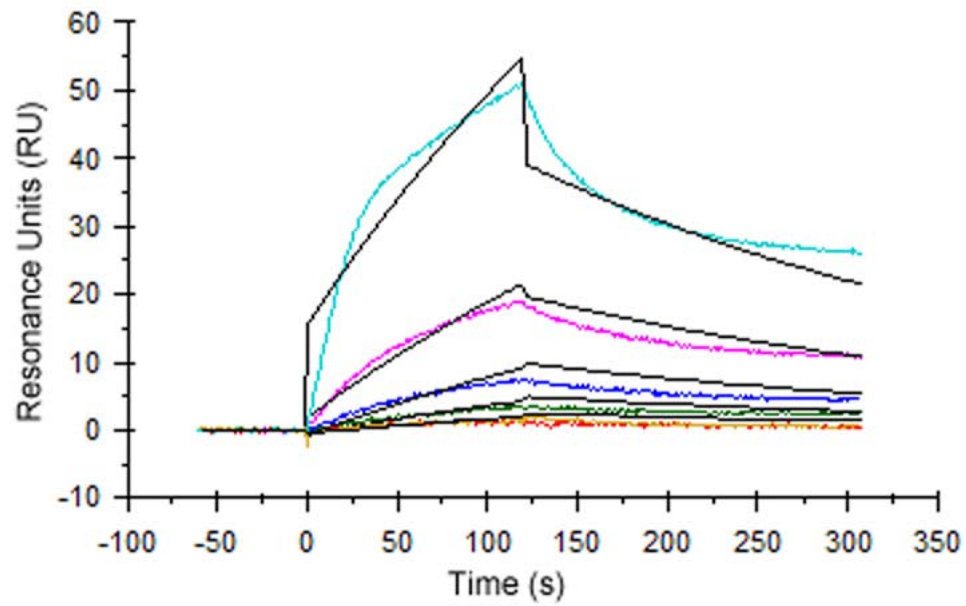

Supplement: 13238_2013_2100_MOESM1_ESM.pdf [file 13238_2013_2100_MOESM1_ESM.pdf]
